## Changes in HIV Treatment Differentiated Care Utilization During the COVID-19 Pandemic in Zambia

Youngji Jo<sup>a</sup>, Sydney Rosen<sup>b,c</sup>, Karla Therese L Sy<sup>b,d</sup>, Bevis Phiri<sup>e</sup>, Amy N Huber<sup>c</sup>, Muya Mwansa<sup>f</sup>, Hilda Shakwelele<sup>e</sup>, Prudence Haimbe<sup>e</sup>, Mpande M Mwenechanya<sup>g</sup>, Priscilla Lumano Mulenga<sup>f</sup>, Brooke E Nichols<sup>b,c</sup>

<sup>a</sup> Section of infectious disease, Department of medicine, Boston Medical Center, Boston, MA, USA

<sup>b</sup> Department of Global Health, Boston University School of Public Health, Boston, MA, USA

<sup>c</sup> Health Economics and Epidemiology Research Office, Department of Internal Medicine, School of Clinical Medicine, Faculty of Health Sciences, University of the Witwatersrand, Johannesburg, South Africa

<sup>d</sup> Department of Epidemiology, Boston University School of Public Health, Boston, MA, USA

<sup>e</sup> Clinton Health Access Initiative, Lusaka, Zambia

<sup>f</sup> Ministry of Health, Lusaka, Zambia

<sup>g</sup> The Centre for Infectious Disease Research in Zambia, Lusaka, Zambia

<sup>§</sup> Corresponding author: Brooke E Nichols

Boston University School of Public Health, 801 Massachusetts Ave, Crosstown Center 3<sup>rd</sup> Floor, Boston, MA, USA; email: [brooken@bu.edu](mailto:brooken@bu.edu); phone: +1-617-358-2403

E-mail addresses of authors:

YJ : [youngji.jo@bmc.org](mailto:youngji.jo@bmc.org)

SR : [sbrosen@bu.edu](mailto:sbrosen@bu.edu)

KTLS : [rsy@bu.edu](mailto:rsy@bu.edu)

BP : [bphiri@clintonhealthaccess.org](mailto:bphiri@clintonhealthaccess.org)

AH : [ahuber@heroza.org](mailto:ahuber@heroza.org)

MM : [muya.mwansa@gmail.com](mailto:muya.mwansa@gmail.com)

HS : [hshakwelele@clintonhealthaccess.org](mailto:hshakwelele@clintonhealthaccess.org)

PH : [phaimbe@clintonhealthaccess.org](mailto:phaimbe@clintonhealthaccess.org)

MMM : [mpande.mwenechanya@cidrz.org](mailto:mpande.mwenechanya@cidrz.org)

PLM : [priscillalloyd2@icloud.com](mailto:priscillalloyd2@icloud.com)

BEN: [brooken@bu.edu](mailto:brooken@bu.edu)

Keywords: Differentiated Service Delivery, COVID-19, Zambia

Word count:

Abstract: 313/350

Main text: 1777/2000

Figures/Table : 2

1 **Abstract (313/350)**  
2

3 **Background:** Differentiated service delivery (DSD) models aim to lessen the burden of HIV treatment on  
4 patients and providers in part by reducing requirements for facility visits and extending dispensing intervals.  
5 With the advent of the COVID-19 pandemic, minimizing patient contact with healthcare facilities and other  
6 patients, while maintaining treatment continuity and avoiding loss to care, has become more urgent, resulting in  
7 efforts to increase DSD uptake. We assessed the extent to which DSD coverage and antiretroviral treatment  
8 (ART) dispensing intervals have changed during the COVID-19 pandemic in Zambia.  
9

10 **Methods:** We used patient data from Zambia's electronic medical record system (SmartCare) for 737 health  
11 facilities, representing about 3/4 of all ART patients nationally, to compare the numbers and proportional  
12 distributions of patients enrolled in DSD models in the six months before and six months after the first case of  
13 COVID-19 was diagnosed in Zambia in March 2020. Segmented linear regression was used to determine whether  
14 the introduction of COVID-19 into Zambia further accelerated the increase in DSD scale-up.  
15

16 **Results:** Between September 2019 and August 2020, 181,317 patients aged 15+ (81,520 and 99,797  
17 from September 1, 2019 to March 1, 2020 and from March 1 to August 31, 2020, respectively) enrolled in  
18 DSD models in Zambia. Overall participation in all DSD models increased over the study period, but uptake  
19 varied by model. The rate of acceleration increased in the second period for home ART delivery (152%), ≤2-  
20 month fast-track (143%), and 3-month MMD (139%). There were significant decelerations in the increase in  
21 enrolment for 4-6-month fast-track (-28%) and 'other' models (-19%).  
22

23 **Conclusions:** Participation in DSD models for stable ART patients in Zambia increased after the advent of  
24 COVID-19, but dispensing intervals diminished. Eliminating obstacles to longer dispensing intervals, including  
25 those related to supply chain management, should be prioritized to achieve the expected benefits of DSD  
26 models and minimize COVID-19 risk.  
27  
28  
29  
30  
31  
32  
33  
34  
35  
36  
37

## 38 Introduction

39

40 In 2020, an estimated 16.4 million people taking antiretroviral therapy (ART) for HIV treatment in sub-Saharan  
41 Africa risked treatment interruptions because of COVID-19 due to closing or limiting of HIV services,  
42 antiretroviral supply chain disruptions, and/or overwhelmed service providers.[1] Maintenance of ART services  
43 — in addition to continued case identification and prompt initiation of newly diagnosed people living with HIV  
44 (PLHIV) on lifelong treatment — is critical to protect the progress that has been made towards HIV epidemic  
45 control.[2]

46

47 One potential solution to the disruptions caused by COVID-19 is differentiated service delivery (DSD), a “patient-  
48 centered approach that simplifies and adapts HIV services across the cascade to serve the needs of people living  
49 with HIV (PLHIV) better and reduce unnecessary burdens on the health system.”[3] DSD has emerged as a key  
50 strategy of HIV programs in resource-limited settings, as, DSD models can lessen the burden of HIV treatment on  
51 patients and providers in part by extending medication dispensing intervals, reducing requirements for facility  
52 visits, and adjusting the location of service delivery. These adjustments also minimize patient contact with  
53 healthcare facilities and other patients, a high priority during the COVID-19 pandemic.

54

55 In Zambia, the Ministry of Health began promoting DSD models for antiretroviral treatment in 2016, with  
56 participation gradually increasing over time.[4] By February 2021, roughly a quarter of the country’s nearly 1  
57 million ART patients had ever been enrolled in a DSD model. The models offered in Zambia included multi-  
58 month dispensing (MMD), fast-track medication pickup, community adherence groups (CAGs), and home ART  
59 delivery, with healthcare facilities varying widely on which of these or other models they adopted. Since 2016, 3-  
60 month dispensing has been the standard of care for stable patients, though it has not been universally  
61 implemented. Six-month dispensing was introduced in 2019. When the country’s first SARS-CoV-2 infection was  
62 confirmed in March 2020, the Ministry of Health doubled down on implementation of 3- and 6-month  
63 dispensing for stable patients. Other models became more or less attractive in the face of COVID-19 risks and  
64 restrictions, depending on whether they required patients to meet as groups (e.g. CAGs) or reduced the need for  
65 public interaction (e.g. home delivery). In this study, we assessed the association between the COVID-19  
66 pandemic and Zambia’s response to it and the rate of change of enrolment in DSD models in the six-  
67 month period before and after diagnosis of the first SARS-CoV-2 case.

68

## 69 Methods

70

71 To assess how DSD model enrolment, by model type, changed before and after the start of the COVID-19  
72 pandemic, we conducted a retrospective review of SmartCare, Zambia’s national electronic medical record  
73 system. As of February 2021, 737,411 patients were recorded in SmartCare as currently on ART, representing  
74 roughly three quarters of all ART patients in the country. The remaining quarter of patients attend facilities that  
75 do not yet utilize SmartCare. We accessed records for all patients aged 15 years or older who enrolled in any  
76 DSD model between September 2019 and August 2020 at any of 737 health facilities across all 10 provinces. We  
77 collapsed the many DSD models recorded in SmartCare into eight groups based on the location and duration of  
78 medication dispensing: ≤2-month fast-track, 3-month fast-track, 4-6-month fast-track, 3-month MMD, 4-6-  
79 month MMD, CAGs, home ART delivery, and all others. A description of each model can be found in Table 1).[5]

80

81 We first describe the basic characteristics of patients enrolled by DSD model before and after the introduction of  
82 COVID-19 in Zambia to determine whether enrolment in models has changed in terms of location (urban/rural,  
83 level of health facility) or in the age or sex distribution of patients enrolling. For each of the DSD model groups,  
84 we calculated the number of DSD enrolments by month from September 2019 to August 2020. To assess the  
85 effect of the COVID-19 pandemic on DSD care utilization, we conducted an interrupted time series analysis using  
86 a segmented regression. Segmented regression has been previously used to evaluate changes at any defined  
87 point in time.[6] In our analysis, we compared the change in slope between the cumulative number of patients  
88 enrolled in DSD before March 1, 2020 compared to March 1<sup>st</sup> through August 2020 (i.e. before and after  
89 March 1st, 2020), the approximate date when COVID-19 was first diagnosed in Zambia.[7] We used the  
90 following segmented regression model:  $DSD_t = \beta_0 + \beta_1 time + \beta_2 covid_t + \beta_3 time \cdot covid_t$  where *time* is in  
91 months, and *covid* is a dummy variable indicating whether the current time is pre- or post-covid. The outcome  
92 *DSD* is the cumulative number of patients enrolled in DSD at time *t*.  $\beta_3$  indicates the slope change following the  
93 intervention, which we then tested whether there was a significant change in  $\beta_3$  before and after March 1,  
94 2020; a significant change in slope would suggest that DSD utilization changed substantially during the COVID-19  
95 pandemic. All analyses were performed at a two-sided significance level of 0.05. Finally, we estimated percent  
96 changes in participation between the periods for each model group based on the mean slope. Data analysis was  
97 conducted in *R version 4.0.2*. (The R Project for Statistical Computing, Vienna Austria).

98

## 99 Ethics

100 This study protocol was approved by ERES Converge IRB (Zambia), protocol number 2019-Sep-030, the Human  
101 Research Ethics Committee (Medical) of the University of Witwatersrand, protocol number M190453, and the  
102 Boston University IRB H-38823.

103

104

## 105 Results

106

107 Participation in DSD models before and after the introduction of COVID-19 in March 2020 is presented  
108 in Table 2. Between September 2019 and August 2020, 181,317 patients aged 15+ enrolled in DSD  
109 models in Zambia, including 81,520 before and 99,797 on or after March 1, 2020, an overall increase of  
110 22.4%. Uptake varied widely by model, however. Between the two periods, participation in 3-month  
111 dispensing increased from 13% to 21% of all DSD enrollments,  $\leq 2$ -month fast-track from 7% to 10%, and home  
112 ART delivery from 1% to 2%. The proportion of all DSD enrollments in 4-6-month fast-track fell from 23% to 14%,  
113 3-month fast-track from 8% to 7%, and CAGs from 4% to 3%. There was no change in the proportion enrolled in  
114 4-6-month MMD (38% of all DSD enrolments in both periods). Proportions of patients enrolled in rural areas  
115 increased for  $\leq 3$ -month fast-track, 3-month-MMD, community adherence groups, and others. Home ART  
116 delivery was the only model to see a relative increase in the proportion of patients enrolled in urban areas  
117 (Table 2). There were no significant differences between the two time periods in the composition of the  
118 population enrolled in terms of sex or age.

119

120 Participation in DSD models accelerated over the study period. Comparing the periods before and after March 1,  
121 2020, segmented linear regression models demonstrated an acceleration in the rate of increase (significant

122 increases in slope) in participation during the COVID-19 pandemic for home ART delivery (152% change in slope  
123 between periods),  $\leq 2$ -month fast-track (143%), and 3-month MMD (139%). Three-month fast-track showed  
124 both an immediate increase in numbers enrolled (155% from 6,278 to 9,729) and a significant acceleration in the  
125 rate of increase (60%) between the two periods. In contrast, there were significant decelerations in the increase  
126 in enrolment for 4-6-month fast-track (-28%) and for 'other' models (-19%) (Figure 1).

127

## 128 Discussion

129

130 Over the course of 2020, the COVID-19 pandemic was associated with accelerated participation in DSD models  
131 in Zambia, though with uneven increases across the models. Most new patients enrolled in  $\leq 2$ -month fast track,  
132 3-month MMD, 4-6-month MMD, CAGs, or home ART delivery. On the other hand, increase in DSD enrollment  
133 was slower for the 4-6-month fast-track and 'other' models. Participation in home ART delivery increased the  
134 most (168%), but it still accounted for only a small proportion of all participation (2%). Recommendations that  
135 high-risk individuals remain at home, in order to minimize their exposure to SARS-CoV-2, may potentially explain  
136 the expansion of home delivery models. We also found an immediate jump in enrolment for  $\leq 2$ -month and  
137 3-month fast-track in March 1, 2020 and an increase one month later for home ART delivery.

138

139 Although 6-month dispensing is Zambia's national policy for stable patients, the proportion of patients  
140 enrolled in the 6-month dispensing model fell between the two time periods, while  $\leq 3$ -month  
141 dispensing increased. The shortening of dispensing intervals may be primarily due to patients switching  
142 temporarily from the newer ARV regimen of tenofovir+lamivudine+dolutegravir (TLD) back to the  
143 previous regimen tenofovir+lamivudine+efavirenz (TLE) to mitigate threats to the TLD global supply  
144 chain. In a recent WHO survey, five of 13 countries in sub-Saharan Africa reported ART stock availability for  
145 major first-line regimens to be 3 months or less due, in part, to failure of suppliers to deliver on time.[8] There is  
146 clear tension between the desire to implement longer-duration dispensing to minimize patient interaction at  
147 healthcare facilities due to COVID-19 transmission concerns and the reality of the impact that the pandemic has  
148 had on the global supply chain. If supply chain concerns are responsible for the drop in dispensing duration we  
149 observed in Zambia, then 6-month dispensing should be expected to rebound as the pandemic is brought under  
150 control and the supply chain strengthens.

151

152 Our study has several limitations. We relied entirely on routinely collected medical record data, which may be  
153 incomplete in some cases. While interrupted time series analysis allows the ability to control for secular trends  
154 in the data (unlike pre-/post- cross-sectional studies) using population-level data with clear graphical  
155 presentation of results, this analysis does not illustrate how and why the introduction of COVID-19 resulted  
156 different scale-up patterns by DSD models and whether and to what extent the temporal changes may differ by  
157 setting. Future research may examine the drivers and barriers of multi-month dispensing from both the demand  
158 and supply side aspects in the context of COVID-19 to improve continuation of care. Moreover, this analysis  
159 focused on DSD enrolment only; we have not considered retention in the DSD models or care more generally.  
160 Future work should aim to understand how this rapid acceleration of DSD uptake has affected overall retention  
161 in care.

162

## 163 Conclusions

164

165 Based on national electronic medical record data for patients enrolled in DSD models in Zambia from September  
166 2019-August 2020, our findings suggest that the introduction of the COVID-19 pandemic was associated with an  
167 acceleration in the scale-up of DSD models for patients on ART in Zambia. Efforts to eliminate obstacles to  
168 longer dispensing intervals should be prioritized to achieve the expected benefits of DSD models and minimize  
169 COVID-19 risk. This process has already begun in Zambia, where the government is now recommending  
170 relaxation of eligibility criteria for multi-month dispensing, such that all patients initiating ART to receive a three  
171 or six month supply of medications immediately, allowing them to delay their first follow-up visit for three or six  
172 months after initiation [9]. Evaluating the impact of this evolution in DSD guidelines will be a high priority for the  
173 coming years.

174

175

#### 176 **Competing interests**

177 The authors declare that they have no conflicting interests.

178

#### 179 **Authors' contributions**

180 YJ, SR and BEN conceived the study. YJ, SR, KTLS, BEN designed the study. BP, MM, HS, PH, MMM, PLM led study  
181 data collection. YJ, KTLS analyzed the data, and SR, ANH, BEN contributed to data analysis. YJ, SR, KTLS, BEN  
182 wrote the first draft of the manuscript. All authors reviewed and edited the manuscript. All authors have read  
183 and approved the final manuscript.

184

185

#### 186 **Acknowledgements**

187 None declared

188

#### 189 **Funding**

190 Funding for the study was provided by the Bill & Melinda Gates Foundation through OPP1192640 to Boston  
191 University. The funder had no role in study design, data collection and analysis, decision to publish or  
192 preparation of the manuscript.

193

#### 194 **List of abbreviations**

|     |                                 |
|-----|---------------------------------|
| ART | Antiretroviral therapy          |
| CAG | Community adherence group       |
| DSD | Differentiated service delivery |
| HIV | Human immunodeficiency virus    |
| MMD | Multi-month dispensing          |

195

196

197

198

199

200

201

202 **Table 1.** Description of each of the evaluated differentiated service delivery models implemented in Zambia  
 203 between September 2019 and August 2020

| <b>Differentiated service delivery model</b>      | <b>Description</b>                                                                                                                                                                                                                                                                                                                                                                                                                                                                                                                                                                                                                                                                                                                                                                                                                                                                                                                               |
|---------------------------------------------------|--------------------------------------------------------------------------------------------------------------------------------------------------------------------------------------------------------------------------------------------------------------------------------------------------------------------------------------------------------------------------------------------------------------------------------------------------------------------------------------------------------------------------------------------------------------------------------------------------------------------------------------------------------------------------------------------------------------------------------------------------------------------------------------------------------------------------------------------------------------------------------------------------------------------------------------------------|
| Fast-track (≤2-month, 3-month, 4-6-month)         | A model that creates a separate queue, kiosk, or procedure at a facility to speed up service delivery for stable patients.[5] In Zambia, this typically involves a separate and shorter queue for quick dispensing when a clinical visit is not indicated.                                                                                                                                                                                                                                                                                                                                                                                                                                                                                                                                                                                                                                                                                       |
| Multi-month dispensing (MMD) (3-month, 4-6-month) | Any model in which the primary goal is to dispense medications for a longer duration than is done under standard care (usually 3 or 6 months).[5] Dispensing is typically done alongside a clinical facility-based visit.                                                                                                                                                                                                                                                                                                                                                                                                                                                                                                                                                                                                                                                                                                                        |
| Community adherence group (CAG)                   | Group of ±6 people, based on residential proximity or patient preference, meet monthly at a designated place in the community. Members collect medication at clinical appointments for other CAG members, in a rotating fashion.[4]                                                                                                                                                                                                                                                                                                                                                                                                                                                                                                                                                                                                                                                                                                              |
| Home ART delivery                                 | Trained community health workers (CHWs) linked to facilities conduct home visits to deliver ART, conduct health screening, monitor adherence and refer patients as required. All community services are captured on a tablet-based SmartCare linked Community HTC or Community ART module.[4]                                                                                                                                                                                                                                                                                                                                                                                                                                                                                                                                                                                                                                                    |
| Others                                            | There are a number of additional models currently enrolling patients in Zambia, but all at a relatively small scale. These models include: after/before hours [ART dispensing available outside standard clinic hours], central dispensing unit [ART dispensing at a central distribution point in the community], community ART distribution points [ART dispensing at distribution points in the community], community pharmacy [ART dispensing at pharmacies in the community], health post [ART dispensing at the most remote facilities that do not typically dispense ART], scholar [expanded hours, focused on school-going youth], rural/urban adherence groups [pre-packed ART dispensed by a healthcare worker in a group setting outside of typical clinic hours], mobile ART distribution [ART dispensed in the community in more remote areas that do not have easy clinic access], weekend clinic [ART dispensing on the weekend]. |

**Table 2.** Percentage change in numbers of patients enrolled in DSD models before and after COVID-19 introduction in Zambia (n=181,317)

| Parameters                      |                     | Number of patients | Location |       | Health care level |        |          | Sex   |        | Age (Mean, SD) |
|---------------------------------|---------------------|--------------------|----------|-------|-------------------|--------|----------|-------|--------|----------------|
|                                 |                     |                    | Urban    | Rural | Health post       | Clinic | Hospital | Male  | Female |                |
| All models                      | Before <sup>a</sup> | 81520              | 64997    | 16523 | 4587              | 49619  | 27314    | 28562 | 46808  | 42 (11)        |
|                                 | After <sup>b</sup>  | 99797              | 75424    | 24373 | 5218              | 58403  | 36176    | 36386 | 59587  | 41 (12)        |
|                                 | %Δ <sup>c</sup>     | 22%                | 16%      | 48%   | 14%               | 18%    | 32%      | 27%   | 27%    | -              |
| ≤2-month fast track dispensing  | Before              | 6005               | 4405     | 1600  | 302               | 4202   | 1501     | 2078  | 3927   | 40 (12)        |
|                                 | After               | 10163              | 7205     | 2958  | 618               | 6854   | 2691     | 3654  | 6509   | 39 (11)        |
|                                 | %Δ                  | 69%                | 64%      | 85%   | 105%              | 63%    | 79%      | 76%   | 66%    | -              |
| 3-month fast-track dispensing   | Before              | 6325               | 5788     | 537   | 318               | 3973   | 2034     | 2067  | 4258   | 41 (10)        |
|                                 | After               | 6917               | 6140     | 777   | 350               | 4360   | 2207     | 2427  | 4490   | 41 (11)        |
|                                 | %Δ                  | 9%                 | 6%       | 45%   | 10%               | 10%    | 9%       | 17%   | 5%     | -              |
| 4-6-month fast-track dispensing | Before              | 19112              | 18283    | 829   | 2013              | 10026  | 7073     | 6481  | 12631  | 43 (10)        |
|                                 | After               | 14168              | 13627    | 541   | 975               | 7553   | 5640     | 5172  | 8996   | 43 (10)        |
|                                 | %Δ                  | -26%               | -25%     | -35%  | -52%              | -25%   | -20%     | -20%  | -29%   | -              |
| 3-month MMD                     | Before              | 10743              | 8215     | 2528  | 410               | 7101   | 3232     | 3744  | 6999   | 41 (11)        |
|                                 | After               | 21101              | 14812    | 6289  | 1122              | 13030  | 6949     | 7564  | 13537  | 41 (12)        |
|                                 | %Δ                  | 96%                | 80%      | 149%  | 174%              | 83%    | 115%     | 102%  | 93%    | -              |
| 4-6-month MMD                   | Before              | 30832              | 22447    | 8385  | 998               | 19689  | 10145    | 11246 | 19586  | 44 (11)        |
|                                 | After               | 38120              | 28260    | 9860  | 1439              | 21576  | 15105    | 14172 | 23948  | 43 (11)        |
|                                 | %Δ                  | 24%                | 26%      | 18%   | 44%               | 10%    | 49%      | 26%   | 22%    | -              |
| Community adherence groups      | Before              | 2885               | 1595     | 1290  | 112               | 1628   | 1145     | 917   | 1968   | 45 (11)        |
|                                 | After               | 3483               | 1362     | 2121  | 133               | 2220   | 1130     | 1231  | 2252   | 45 (11)        |
|                                 | %Δ                  | 21%                | -15%     | 64%   | 19%               | 36%    | -1%      | 34%   | 14%    | -              |
| Home ART delivery               | Before              | 721                | 444      | 277   | 240               | 132    | 349      | 283   | 438    | 39 (12)        |
|                                 | After               | 1929               | 1472     | 457   | 288               | 838    | 803      | 686   | 1243   | 39 (12)        |
|                                 | %Δ                  | 168%               | 232%     | 65%   | 20%               | 535%   | 130%     | 142%  | 184%   | -              |
| Others                          | Before              | 4897               | 3820     | 1077  | 194               | 2868   | 1835     | 1746  | 3151   | 40 (13)        |
|                                 | After               | 3916               | 2546     | 1370  | 293               | 1972   | 1651     | 1480  | 2436   | 39 (13)        |
|                                 | %Δ                  | -20%               | -33%     | 27%   | 51%               | -31%   | -10%     | -15%  | -23%   | -              |

- a. Before- September 2019-February 2020  
 b. After- March 2020-August 2020  
 c. Percentage increase between before and after periods



20 **Figure 1.** Interrupted time series scatter plot and slope lines for the DSD models before (September 2019-February  
21 2020) and after (March 2020-August 2020) March 1, 2020 in Zambia  
22

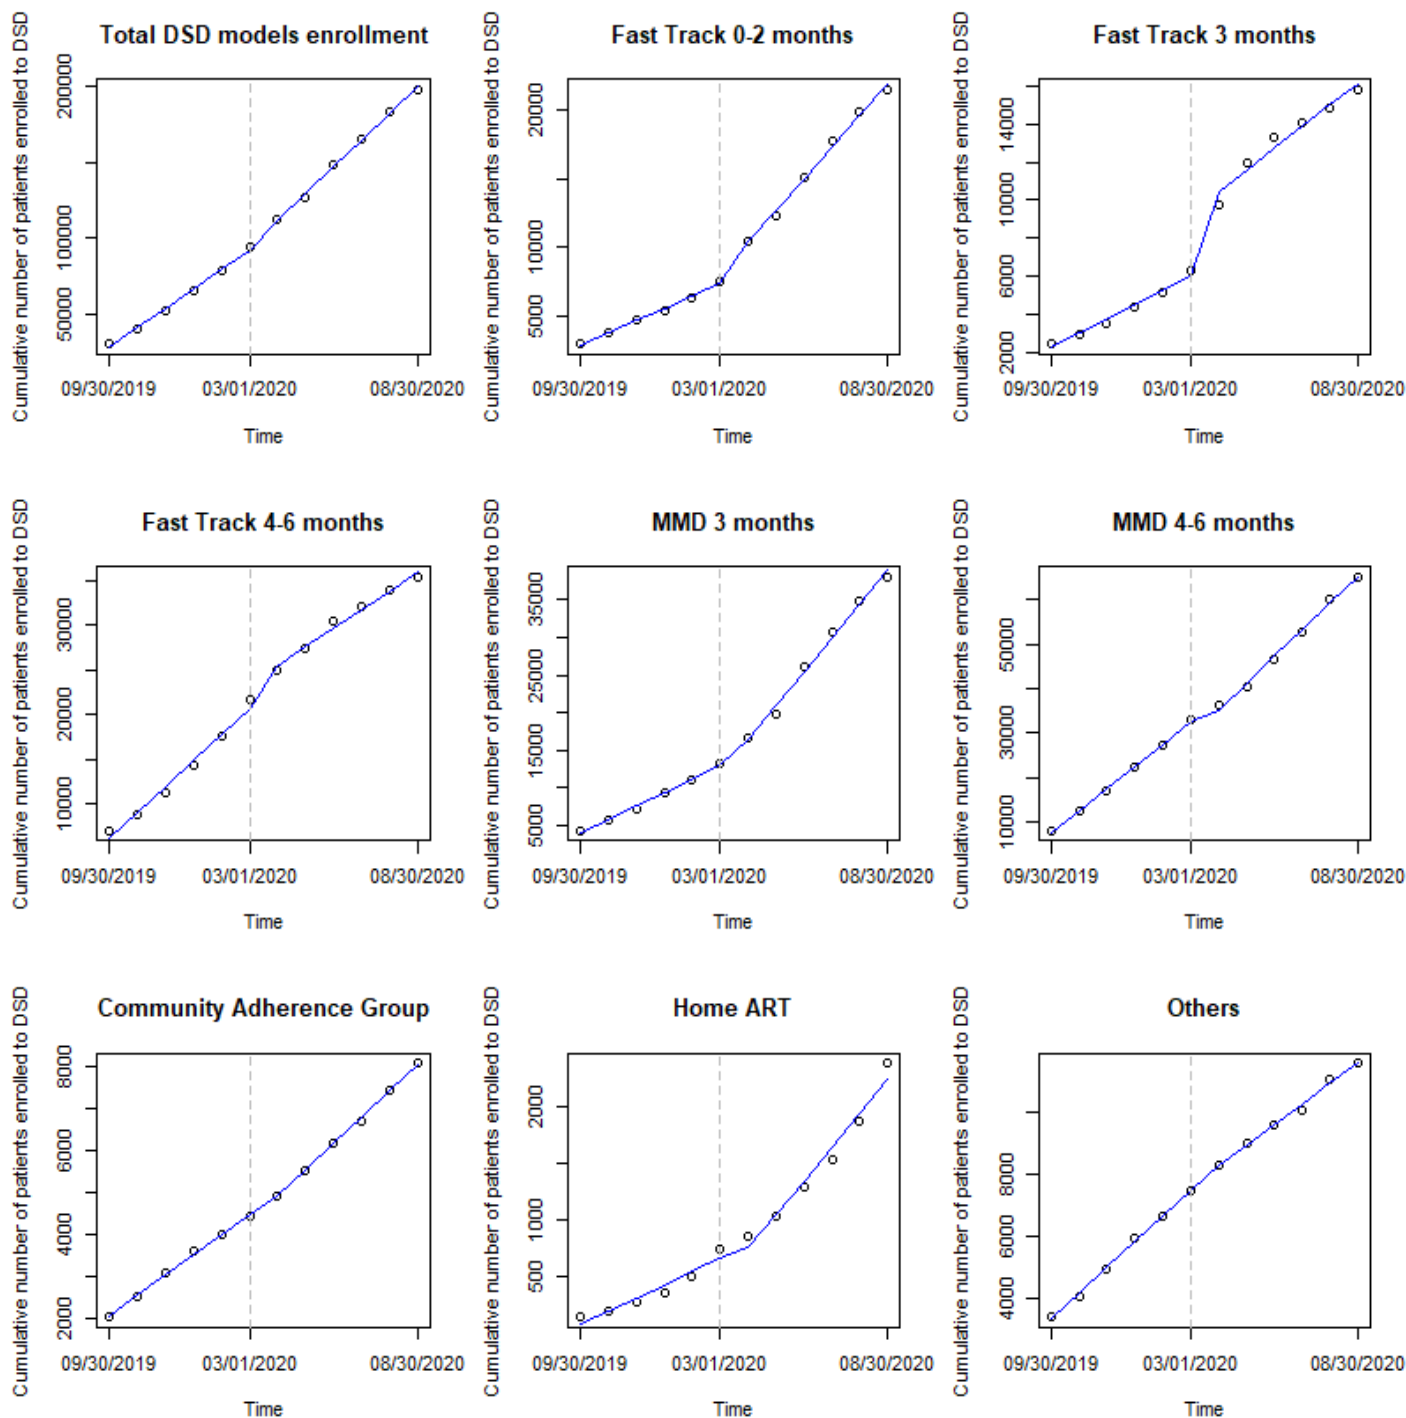

23  
24  
25  
26  
27  
28

## References

1. World Health Organization. The cost of inaction: COVID-19-related service disruptions could cause hundreds of thousands of extra deaths from HIV. May 11, 2020. <https://www.who.int/news/item/11-05-2020-the-cost-of-inaction-covid-19-related-service-disruptions-could-cause-hundreds-of-thousands-of-extra-deaths-from-hiv>
2. CDC. Operational Considerations for Maintaining Essential Services and Providing Care and Treatment for those Living with HIV in Low-Resource non-US Settings During the COVID-19 Pandemic. <https://www.cdc.gov/coronavirus/2019-ncov/downloads/global-covid-19/COVID-Essential-services-HIV.pdf>
3. Ehrenkranz, P., et al., *Expanding the Vision for Differentiated Service Delivery: A Call for More Inclusive and Truly Patient-Centered Care for People Living With HIV*. J Acquir Immune Defic Syndr, 2021. **86**(2): p. 147-152.
4. Nichols, B.E., et al., *Community-based delivery of HIV treatment in Zambia: costs and outcomes*. AIDS, 2021. **35**(2): p. 299-306.
5. Huber A, Pascoe S, Nichols B, Long L, Kuchukhidze S, Phiri B, Tchereni T, Rosen S. Differentiated service delivery models for HIV treatment in Malawi, South Africa, and Zambia: A landscape analysis. Global Health: Science and Practice; in press.
6. Bernal, J.L., S. Cummins, and A. Gasparrini, *Interrupted time series regression for the evaluation of public health interventions: a tutorial*. Int J Epidemiol, 2017. **46**(1): p. 348-355.
7. CDC. First 100 Persons with COVID-19 — Zambia, March 18–April 28, 2020. October 23, 2020. <https://www.cdc.gov/mmwr/volumes/69/wr/mm6942a5.htm>
8. Jewell, B.L., et al., *Potential effects of disruption to HIV programmes in sub-Saharan Africa caused by COVID-19: results from multiple mathematical models*. Lancet HIV, 2020. **7**(9): p. e629-e640.
9. Anna Grimsrud. Impacts of COVID 19 to HIV service delivery.14 August 2020. [https://www.differentiatedservicedelivery.org/Portals/0/adam/Content/EBB9KL28MUOMZ6NaaUclaA/File/WEBINAR1\\_1\\_IAS\\_Anna\\_presentation.pdf](https://www.differentiatedservicedelivery.org/Portals/0/adam/Content/EBB9KL28MUOMZ6NaaUclaA/File/WEBINAR1_1_IAS_Anna_presentation.pdf)
